# Supplementary material
Source: Springer Nature journal article supplement (https://www.springermedizin.de/resource/supplementary/13069_2012_124_MOESM2_ESM.pdf/9659870)

### MMP-3

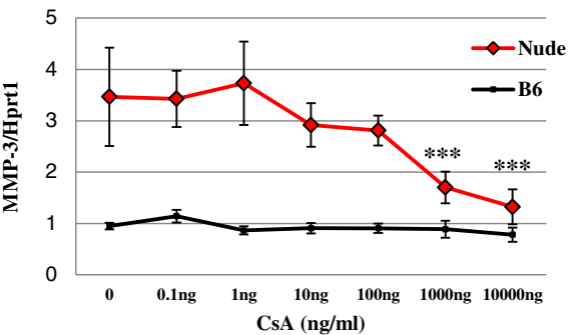

### MMP-9

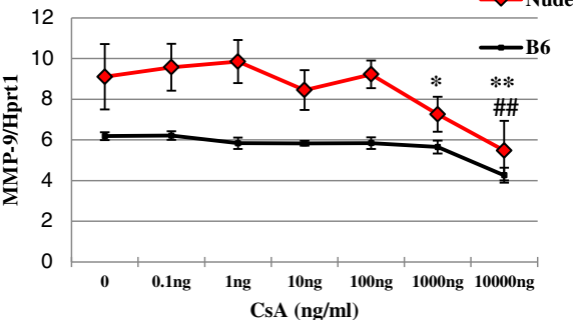

### MMP-13

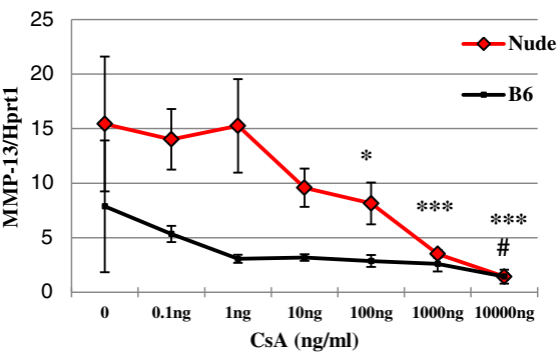

Supplement: MOESM2 [file 9659870]
